# Supplementary material for: Catchment tracers reveal discharge, recharge and sources of groundwater-borne pollutants in a novel lake modelling approach
Source: Copernicus journal article supplement (doi:10.5194/bg-15-1203-2018), 2018-02-28
Supplement: Supplementary file 1 [file bg-15-1203-2018-supplement.pdf]

Supplement of Biogeosciences, 15, 1203–1216, 2018  
<https://doi.org/10.5194/bg-15-1203-2018-supplement>  
© Author(s) 2018. This work is distributed under  
the Creative Commons Attribution 3.0 License.

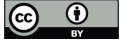

*Supplement of*

## **Catchment tracers reveal discharge, recharge and sources of groundwater-borne pollutants in a novel lake modelling approach**

**Emil Kristensen et al.**

*Correspondence to:* Emil Kristensen (emil.kristensen@bio.ku.com)

The copyright of individual parts of the supplement might differ from the CC BY 3.0 License.

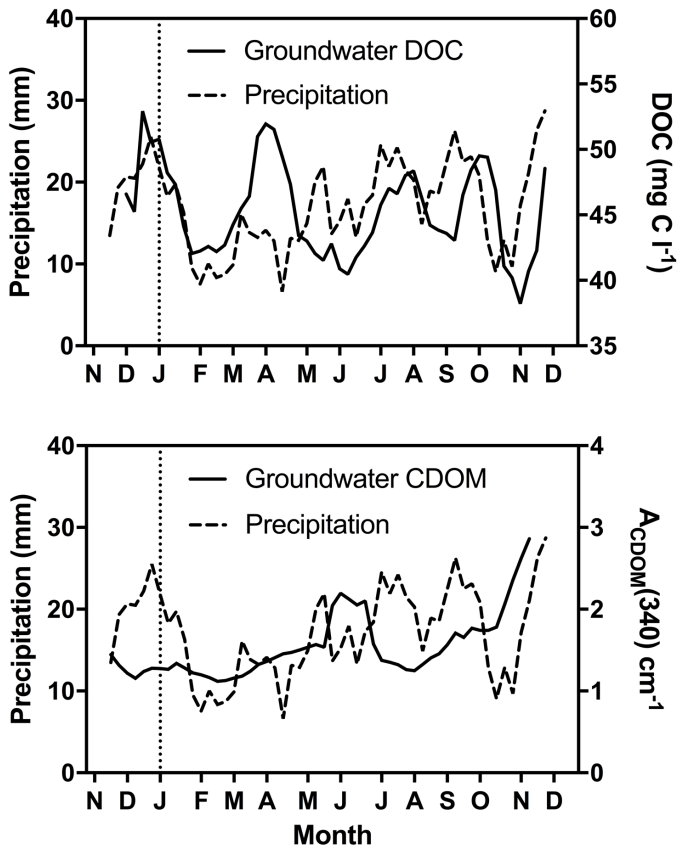

5

Figure S1: Weekly CDOM absorption ( $A_{CDOM}(340) \text{ cm}^{-1}$ ) and DOC ( $\text{mg C l}^{-1}$ ) measurements from a drainage channel in the catchment area and precipitation (mm) data from a weather station placed at the lake shore. Data are shown as the running average of four weeks.

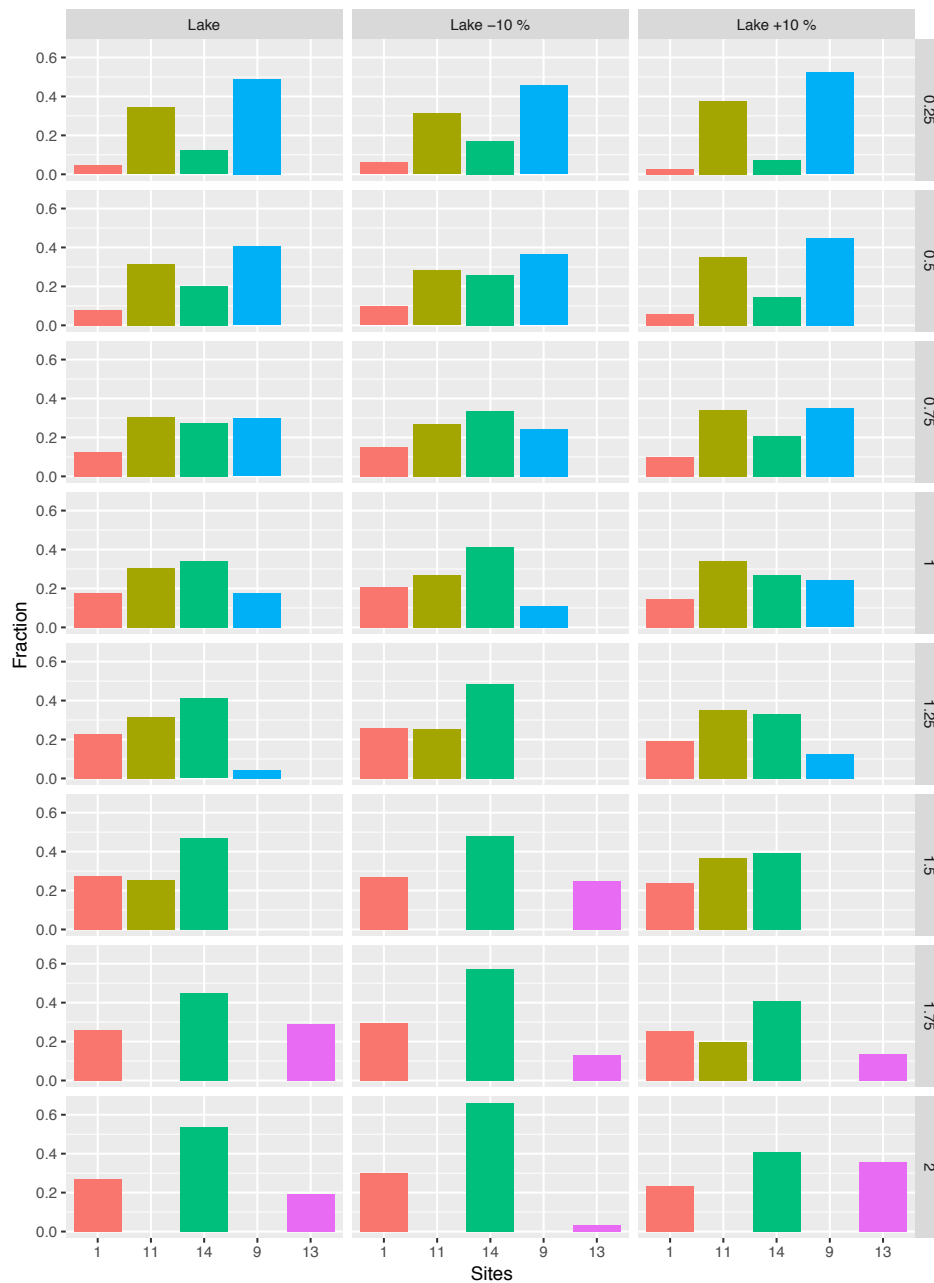

5 **Figure S2:** Bar plot showing the results from the sensitivity analysis derived from the CATS model. The top x-axis shows the different concentrations used for the lake e.g. no change (Lake), 10 % reduction (Lake -10 %) and 10 % increment (Lake +10. The left y-axis denotes the estimated fractions of inflowing groundwater originating from the groundwater well sites (bottom x-axis, only sites delivering more than 0.01 are shown) and the second y-axis denotes the corresponding WRT. In general, a smaller variance between sites and discharge fractions is seen up to a WRT of 1.25 years. Above this point there is some changes between site 11 and 13. Overall, the same 5 groundwater well sites are isolated which explain the measured lake concentrations.

**Table S1: Tracer concentrations of  $\delta^{18}\text{O}$  (‰), dissolved organic carbon (DOC  $\mu\text{mol l}^{-1}$ ), coloured dissolved organic matter ( $A_{\text{CDOM}(340)} \text{ cm}^{-1}$ ), total dissolved phosphorus (TDP  $\mu\text{g l}^{-1}$ ), total phosphorus (TP  $\mu\text{g l}^{-1}$ ), total dissolved nitrate (TDN  $\mu\text{g l}^{-1}$ ), total nitrate (TN  $\mu\text{g l}^{-1}$ ) and maximum fluorescence of component C1-C5 in Raman's units (R.U.) found around the lake (1-30), in the lake (a, b and c) and at a water locked (WL) site. Dissolved nutrients are measured in groundwater while total fractions are found in lake water. For site reference see figure 1a.**

5

| Sites    | $\delta^{18}\text{O}$<br>‰ | DOC<br>$\mu\text{mol l}^{-1}$ | CDOM<br>$A_{\text{CDOM}(340)}$<br>$\text{cm}^{-1}$ | TDP/T<br>P<br>$\mu\text{g l}^{-1}$ | TDN/T<br>N<br>$\mu\text{g l}^{-1}$ | C1<br>R.U. | C2<br>R.U. | C3<br>R.U. | C4<br>R.U. | C5<br>R.U. |
|----------|----------------------------|-------------------------------|----------------------------------------------------|------------------------------------|------------------------------------|------------|------------|------------|------------|------------|
| Lake (a) |                            | 952                           | 0.40                                               | 36                                 | 708                                | 7.8        | 3.1        | 2.1        | 1.1        | 0.3        |
| Lake (b) | -4.6                       | 1117                          | 0.41                                               | 28                                 | 662                                | 7.8        | 3.1        | 2.2        | 1.1        | 0.3        |
| Lake (c) | -4.6                       | 1105                          | 0.40                                               | 29                                 | 652                                | 7.8        | 3.1        | 2.2        | 1.1        | 0.3        |
| 1        | -7.2                       | 3115                          | 1.29                                               | 42                                 | 994                                | 14.9       | 6.8        | 4.3        | 3.1        | 0.7        |
| 2        | -9.2                       | 5032                          | 1.53                                               | 105                                | 1051                               | 21.6       | 9.8        | 7.8        | 3.8        | 1.0        |
| 3        | -9.0                       | 7782                          | 2.04                                               | 102                                | 1148                               | 32.7       | 14.2       | 11.6       | 5.1        | 1.3        |
| 4        | -8.6                       | 10467                         | 2.50                                               | 167                                | 1671                               | 44.3       | 18.0       | 15.7       | 5.1        | 1.1        |
| 5        | -9.4                       | 5735                          | 1.59                                               | 90                                 | 1031                               | 28.7       | 12.4       | 10.9       | 3.7        | 0.7        |
| 6        | -8.2                       | 8791                          | 3.11                                               | 134                                | 1477                               | 36.3       | 16.3       | 12.6       | 6.2        | 1.5        |
| 7        | -8.2                       | 9298                          | 2.94                                               | 124                                | 1419                               | 47.1       | 21.6       | 15.8       | 7.6        | 1.9        |
| 8        | -7.3                       | 4943                          | 1.48                                               | 64                                 | 1250                               | 26.7       | 14.3       | 11.2       | 5.2        | 2.9        |
| 9        | -6.6                       | 1721                          | 0.31                                               | 54                                 | 405                                | 7.0        | 3.4        | 2.6        | 1.1        | 0.1        |
| 10       | -7.3                       | 4483                          | 0.58                                               | 17                                 | 856                                | 20.8       | 8.9        | 9.1        | 2.3        | 0.3        |
| 11       | -6.9                       | 2504                          | 0.32                                               | 9                                  | 764                                | 6.9        | 3.1        | 2.9        | 0.9        | 0.1        |
| 12       | -6.6                       | 4229                          | 0.55                                               | 18                                 | 857                                | 13.7       | 6.2        | 5.9        | 2.0        | 0.2        |
| 13       | -6.8                       | 3848                          | 0.64                                               | 34                                 | 1285                               | 13.8       | 6.2        | 6.0        | 2.0        | 0.4        |
| 14       | -7.0                       | 5868                          | 0.87                                               | 124                                | 2198                               | 13.9       | 5.7        | 6.2        | 1.2        | 0.3        |
| 15       | -6.7                       | 10656                         | 2.41                                               | 59                                 | 2309                               | 41.1       | 20.7       | 16.1       | 6.1        | 1.8        |
| 16       | -4.3                       | 2674                          | 0.26                                               | 4                                  | 325                                | 7.6        | 3.3        | 2.1        | 1.6        | 0.4        |
| 17       | -5.2                       | 3115                          | 0.24                                               | 12                                 | 589                                | 7.5        | 3.3        | 2.1        | 1.8        | 0.4        |
| 18       | -4.8                       | 5032                          | 0.24                                               | 15                                 | 726                                | 7.6        | 3.2        | 2.2        | 1.7        | 0.4        |
| 19       | -4.7                       | 7782                          | 0.27                                               | 1                                  | 592                                | 7.6        | 3.3        | 2.1        | 1.5        | 0.6        |
| 20       | -4.6                       | 10467                         | 0.32                                               | 7                                  | 522                                | 7.6        | 3.2        | 2.2        | 1.2        | 0.5        |
| 21       | -4.5                       | 5735                          | 0.31                                               | 10                                 | 657                                | 7.6        | 3.2        | 2.3        | 1.3        | 0.6        |
| 22       | -4.7                       | 8791                          | 0.34                                               | 10                                 | 656                                | 7.6        | 3.3        | 2.2        | 1.4        | 0.5        |
| 23       | -5.3                       | 9298                          | 0.34                                               | 30                                 | 667                                | 7.6        | 3.3        | 2.2        | 1.3        | 0.3        |
| 24       | -5.1                       | 4943                          | 0.52                                               | 26                                 | 709                                | 7.7        | 3.0        | 2.4        | 1.1        | 0.3        |
| 25       | -4.6                       | 1721                          | 0.80                                               | 30                                 | 1016                               | 15.0       | 5.9        | 5.1        | 1.8        | 0.5        |
| 26       | -4.6                       | 4483                          | 0.32                                               | 66                                 | 436                                | 7.7        | 3.1        | 2.2        | 1.3        | 0.3        |
| 27       | -4.4                       | 2504                          | 0.30                                               | 38                                 | 511                                | 7.6        | 3.3        | 2.0        | 1.6        | 0.3        |
| 28       | -5.1                       | 4229                          | 0.90                                               | 65                                 | 859                                | 15.0       | 6.2        | 4.8        | 2.1        | 0.5        |
| 29       | -4.3                       | 3848                          | 1.21                                               | 81                                 | 775                                | 18.5       | 8.4        | 5.7        | 3.7        | 1.0        |
| 30       | -6.8                       | 5868                          | 1.09                                               | 59                                 | 788                                | 17.4       | 9.3        | 6.0        | 4.3        | 0.9        |
| WL       | -6.7                       | 4276                          | 2.6                                                | 193                                | 2388                               | 41.7       | 16.4       | 19.5       | 3.5        | 2.6        |
